# Supplementary material for: Influence of Habitat and Food Resource Availability on Common Raven Nest Site Selection and Reproductive Success in Mediterranean Forests
Source: MDPI journal article supplement (doi:10.3390/birds2030022), 2021-09-09
Supplement: s1 [file s1]

---

## Supplementary material

# Influence of Habitat and Food Resource Availability on Common Raven Nest Site Selection and Reproductive Success in Mediterranean Forests

Amalia Segura \* and Pelayo Acevedo

SaBio Research Group, Instituto de Investigación en Recursos Cinegéticos, IREC (CSIC-UCLM-JCCM), Ronda de Toledo, 12, 13071 Ciudad Real, Spain; pelayo.acevedo@uclm.es

\* Correspondence: [amaliasegura@gmail.com](mailto:amaliasegura@gmail.com); Tel.: +34-926295450

**Table S1.** List of candidate models for both nest site selection model and raven recruitment model. In bold the most parsimonious ones.

| Nest site selection model                        |  | AIC        |
|--------------------------------------------------|--|------------|
| Height                                           |  | 61         |
| DBH                                              |  | 99         |
| Mature tree density                              |  | 103        |
| Scrub cover                                      |  | 102        |
| Bare ground cover                                |  | 93         |
| Scrub richness                                   |  | 103        |
| Road distance                                    |  | 103        |
| Tortoise density                                 |  | 103        |
| Height+Bare ground cover                         |  | 49         |
| <b>Height+Bare ground cover+Tortoise density</b> |  | <b>35</b>  |
|                                                  |  | <u>AIC</u> |
| <u>Recruitment model</u>                         |  |            |
| Road distance                                    |  | 128.8      |
| Bare ground cover                                |  | 129        |
| Scrub richness                                   |  | 128.6      |
| Scrub cover                                      |  | 129        |
| <b>Predated tortoise</b>                         |  | <b>126</b> |

---

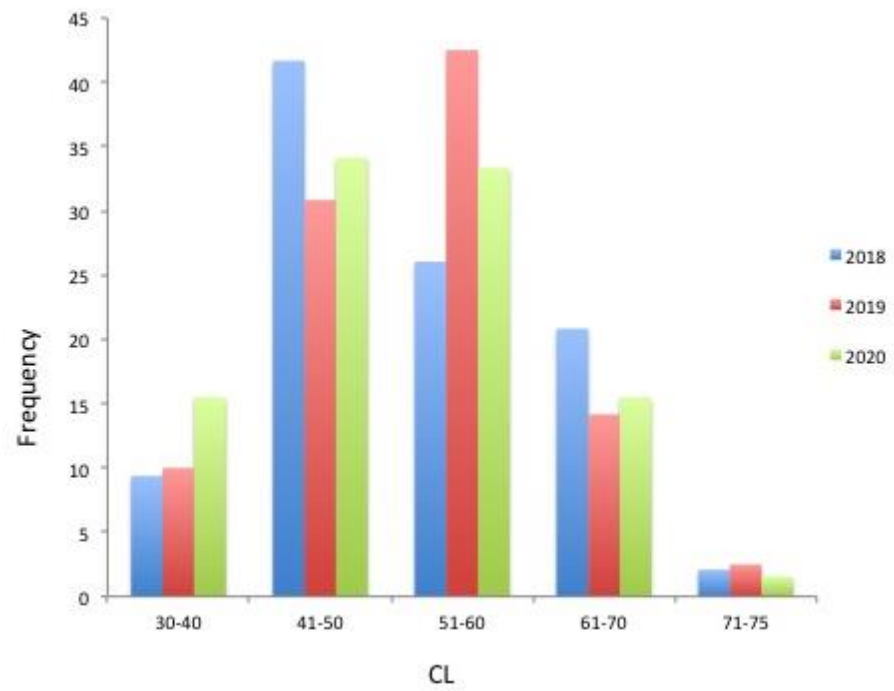

**Figure S1.** Frequency of predated young spur-thighed tortoises (*Testudo graeca*) by size classes (mm CL) and seasons (2018-2020).
