# Supplementary material for: Influence of Habitat and Food Resource Availability on Common Raven Nest Site Selection and Reproductive Success in Mediterranean Forests
Source: MDPI journal article supplement (doi:10.3390/birds2030022), 2021-09-09
Supplement: s1 [file s1]

Archive with 1 entries (1 files):
- birds-1346473-supplementary.pdf
